# Supplementary material for: Modeling the Sensitivity of Field Surveys for Detection of Environmental DNA (eDNA)
Source: PubMed Central journal article supplement (PMC4624909; doi:10.1371/journal.pone.0141503), 2015-10-28
Supplement: pone.0141503.s002.pdf [file pone.0141503.s002.pdf]

Table S1. Fraction of PCR replicates causing fluorescence on an agarose gel.

| Expected number of target marker copies | Number of PCR replicates | Fraction of PCR replicates testing positive |             |
|-----------------------------------------|--------------------------|---------------------------------------------|-------------|
|                                         |                          | Bighead carp                                | Silver carp |
| 1                                       | 60                       | 0.217                                       | 0.283       |
| 2                                       | 30                       | 0.700                                       | 0.300       |
| 3                                       | 30                       | 0.800                                       | 0.300       |
| 4                                       | 30                       | 0.800                                       | 0.567       |
| 5                                       | 60                       | 0.817                                       | 0.850       |
| 6                                       | 30                       | 0.933                                       | 0.633       |
| 7                                       | 30                       | 0.967                                       | -†          |
| 8                                       | 30                       | 0.967                                       | 0.900       |
| 9                                       | 30                       | 1.000                                       | 0.933       |
| 10                                      | 60                       | 1.000                                       | 0.983       |
| 11                                      | 30                       | 1.000                                       | 1.000       |
| 12                                      | 30                       | 1.000                                       | 0.967       |
| 13                                      | 30                       | 1.000                                       | 0.967       |
| 14                                      | 30                       | 1.000                                       | 1.000       |
| 15                                      | 30                       | 1.000                                       | 1.000       |
| 50                                      | 30                       | 1.000                                       | 1.000       |
| 100                                     | 30                       | 1.000                                       | 1.000       |
| 200                                     | 30                       | 1.000                                       | 1.000       |
| 500                                     | 30                       | 1.000                                       | 1.000       |
| 1000                                    | 30                       | 1.000                                       | 1.000       |

(†) Not evaluated.
