# Supplementary material for: Modeling the Sensitivity of Field Surveys for Detection of Environmental DNA (eDNA)
Source: PubMed Central journal article supplement (PMC4624909; doi:10.1371/journal.pone.0141503), 2015-10-28
Supplement: pone.0141503.s003.pdf [file pone.0141503.s003.pdf]

Table S2. Fraction of PCR replicates successfully sequenced for target markers.

| Expected number of target marker copies | Target species |                 |               |                |                 |               |
|-----------------------------------------|----------------|-----------------|---------------|----------------|-----------------|---------------|
|                                         | Bighead carp   |                 |               | Silver carp    |                 |               |
|                                         | Number of runs | Successful runs | Success ratio | Number of runs | Successful runs | Success ratio |
| 1                                       | 6              | 0               | 0.000         | 6              | 6               | 1.000         |
| 2                                       | 21             | 2               | 0.095         | 9              | 8               | 0.889         |
| 3                                       | 24             | 0               | 0.000         | 9              | 9               | 1.000         |
| 4                                       | 25             | 6               | 0.240         | 17             | 16              | 0.941         |
| 5                                       | 28             | 4               | 0.143         | 21             | 20              | 0.952         |
| 6                                       | 29             | 6               | 0.207         | 19             | 18              | 0.947         |
| 7                                       | 29             | 13              | 0.448         | 5              | 5               | 1.000         |
| 8                                       | 30             | 4               | 0.133         | 27             | 24              | 0.889         |
| 9                                       | -†             | -†              | -†            | 28             | 15              | 0.536         |
| 10                                      | -†             | -†              | -†            | 29             | 29              | 1.000         |
| 11                                      | -†             | -†              | -†            | 30             | 27              | 0.900         |
| 12                                      | -†             | -†              | -†            | 29             | 28              | 0.966         |
| 13                                      | -†             | -†              | -†            | 29             | 28              | 0.966         |
| 14                                      | -†             | -†              | -†            | 30             | 30              | 1.000         |
| 15                                      | 30             | 25              | 0.833         | 30             | 30              | 1.000         |
| 25                                      | 29             | 13              | 0.448         | -†             | -†              | -†            |
| 50                                      | 30             | 21              | 0.700         | -†             | -†              | -†            |
| 100                                     | 29             | 27              | 0.931         | -†             | -†              | -†            |

(†) Not evaluated.
